# Supplementary material for: Identification of microRNAs dysregulated in cellular senescence driven by endogenous genotoxic stress
Source: PubMed Central journal article supplement (PMC3824412; doi:10.18632/aging.100571), 2013-06-28
Supplement: aging-05-460-s001.pdf [file aging-05-460-s001.pdf]

SUPPLEMENTAL DATA

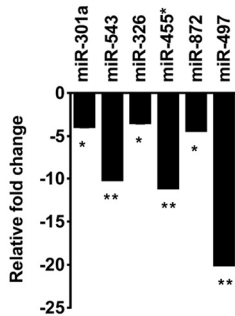

**Supplemental Figure 1. QRT-PCR confirmation of downregulation of six miRNAs identified from the microarray experiments in *Ercc1*<sup>-/-</sup> MEFs, compared to WT MEFs.** MiRNA microarray data (Table 1) was validated by qRT-PCR analysis of *Ercc1*<sup>-/-</sup> MEFs at P7 compared to WT MEFs at P7, grown to 3% O<sub>2</sub>. WT MEFs at P7 were assigned a value of -1. Six miRNAs identified in the microarray were confirmed to be downregulated by qRT-PCR. MiR-455\* refers to the less abundant miRNA product derived from the miR-455 stem-loop precursor. *P*-values were calculated using Welch's t-tests and are indicated by \* (*p* < .001) and \*\* (*p* < .0001).

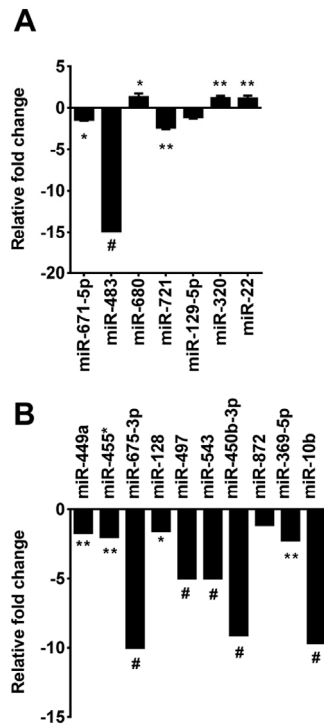

**Supplemental Figure 2. QRT-PCR validation of miRNAs identified from the microarray analysis of late passage *Ercc1*<sup>-/-</sup> MEFs normalized to early passage *Ercc1*<sup>-/-</sup> MEFs.** (A) Three miRNAs identified as being upregulated in late *Ercc1*<sup>-/-</sup> MEFs compared to early passage via microarray (Table 3) were confirmed to be upregulated by qRT-PCR. QRT-PCR expression values are relative to *Ercc1*<sup>-/-</sup> passage 3 samples, which were normalized to a value of either 1 or -1. (B) Ten downregulated miRNAs in P7 *Ercc1*<sup>-/-</sup> MEFs from the microarray analysis (Table 3) were confirmed to be downregulated by qRT-PCR. MiR-455\* refers to the less abundant miRNA product derived from the miR-455 stem-loop precursor. Expression values are relative to *Ercc1*<sup>-/-</sup> passage 3 samples, which were normalized to a value of -1. *P*-values for qRT-PCR data were calculated using Welch's t-tests and are indicated by \* (*p* < .05), \*\* (*p* < .01) and # (*p* < .0001).

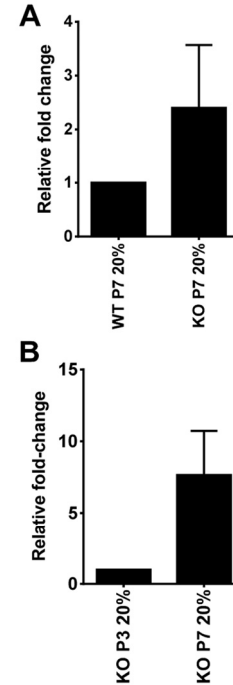

**Supplemental Figure 3. QRT-PCR expression of miR-467a in Passage 3 *Ercc1*<sup>-/-</sup> MEFs, Passage 7 WT MEFs and Passage 7 *Ercc1*<sup>-/-</sup> MEFs grown in 20% O<sub>2</sub>.** (A) MiR-467a is upregulated in *Ercc1*<sup>-/-</sup> MEFs (KO) grown to Passage 7 (P7) in 20% O<sub>2</sub> compared to WT P7 MEFs grown to 20% O<sub>2</sub>. QRT-PCR expression values are relative to WT P7 samples, which were normalized to a value of 1. (B) MiR-467a is upregulated in *Ercc1*<sup>-/-</sup> MEFs (KO) grown to Passage 7 (P7) in 20% O<sub>2</sub> compared to *Ercc1*<sup>-/-</sup> MEFs (KO) grown to Passage 3 in 20% O<sub>2</sub>. Expression values are relative to *Ercc1*<sup>-/-</sup> passage 3 samples, which were normalized to a value of 1. All experiments were performed in triplicate and the standard deviation is plotted as error bars.

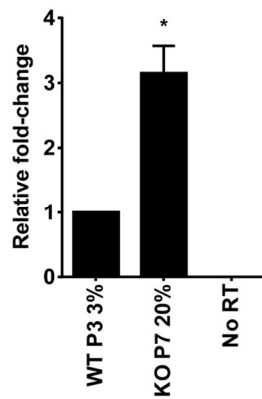

**Supplemental Figure 4. QRT-PCR expression of miR-129-5p in Passage 3 WT MEFs grown in 3% O<sub>2</sub> and Passage 7 *Ercc1*<sup>-/-</sup> MEFs grown in 20% O<sub>2</sub>.** (A) MiR-129-5p is upregulated in late passage senescent *Ercc1*<sup>-/-</sup> MEFs (KO P7) grown in 20% O<sub>2</sub> compared to WT Passage 3 (P3) MEFs grown in 3% O<sub>2</sub>, which are the least senescent cells that we examined in our microarray experiments. QRT-PCR expression values are relative to WT passage 3 MEFs, which were normalized to a value of 1. All experiments were performed in triplicate and the standard deviation is plotted as error bars. *P*-values for qRT-PCR data were calculated using Welch's t-tests and are indicated by \* (*p* < .05).

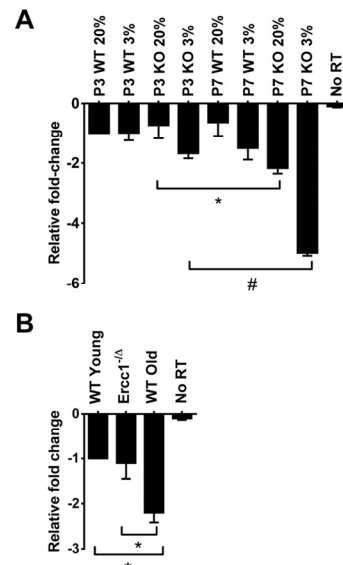

**Supplemental Figure 5. QRT-PCR of Dicer mRNA in primary MEFs and in liver tissues shows reduced expression in senescence and aging.** (A) Dicer mRNA is downregulated in Passage 7 *Ercc1*<sup>-/-</sup> (P7 KO) MEFs. QRT-PCR expression values are relative to WT Passage 3 (P3 WT) samples, which were normalized to a value of 1. (B) QRT-PCR analysis was performed on livers of WT young (20 weeks), progeroid *Ercc1*<sup>-/-</sup> mice (20 weeks), and WT old mice (30 months) to examine Dicer mRNA expression. Dicer mRNA is downregulated significantly in WT Old mouse livers compared to WT Young and *Ercc1*<sup>-/-</sup> livers. The mean of three independent mouse livers for each condition is graphed as fold-change expression relative to WT young livers, which were normalized to a value of -1. All experiments were performed in triplicate and the standard deviation is plotted as error bars. *P*-values were calculated using Welch's t-tests and are indicated by \* (*p* < .05) and # (*p* < .0001).

**Supplemental Table S1. Experimentally validated target genes for miRNAs identified in this study.** 3'-UTR homology between human and mouse gene orthologs was determined using Targetscan 6.2 [76].

| miRNA       | Target gene(s)                                                                                                    | References |
|-------------|-------------------------------------------------------------------------------------------------------------------|------------|
| miR-10b     | Bcl2l11, Hoxd10, Tfp2c                                                                                            | [60]       |
| miR-128     | Abcc5, Bax, Bmi1, E2F3a, E2f5, Hoxa10, Ntrk3, Reln, Ret, Rps6kb1                                                  | [65-69]    |
| miR-449a    | Bcl2, Ccnd1, Ccne2, Cdc25a, Cdk6, Dll1, E2f2, E2f3, E2f5, Gmnn, Hdac1, Hnf4a, Lef1, Met, Myc, Mycn, Notch1, Sirt1 | [70]       |
| miR-450b-3p | No confirmed mRNA targets                                                                                         |            |
| miR-455*    | No confirmed mRNA targets                                                                                         |            |
| miR-497     | Bcl2, Bcl2l2, Ccnd1, Ccnd2, Igf1r, Map2k1, Raf1                                                                   | [71-73]    |
| miR-543     | Twist1                                                                                                            | [74]       |
| miR-872     | Sod1                                                                                                              | [75]       |
